# Supplementary material for: A Novel Pathogenic BRCA1 Splicing Variant Produces Partial Intron Retention in the Mature Messenger RNA
Source: MDPI journal article supplement (doi:10.3390/ijms17122145), 2016-12-21
Supplement: s1 [file s1]

# Supplementary Materials: A Novel Pathogenic *BRCA1* Splicing Variant Produces Partial Intron Retention in the Mature Messenger RNA

Maria Valeria Esposito, Marcella Nunziato, Flavio Starnone, Antonella Telese, Alessandra Calabrese, Giuseppe D'Aiuto, Pietro Pucci, Massimiliano D'Aiuto, Francisco Baralle, Valeria D'Argenio and Francesco Salvatore

a

```
ATCTTCAGGGGGCTAGAAATCTGTTGCTATGGGGCCCTTCACCAACATGCCCACAGATCAA
CTGGAATGGATGGTACAGCTGTGTGGTGCTTCTGTGGTGAAGGAGCTTTCATCATTCACC
CTTGGCACAAGGTGTCCACCCAATTGTGGTTGTGCAGCCAGATGCCTGGACAGAGGACAAT
GGCTTCCATGCAATTGGGCAGATGTGTGAGGCACCTGTGGTGACCCGAGAGTGGGTGTTG
GACAGTGTAGCACTCTACCAGTGCCAGGAGCTGGACACCTACCTGATACCCCAGATCCCC
CACAGCCACT
```

b

```
ATCTTCAGGGGGCTAGAAATCTGTTGCTATGGGGCCCTTCACCAACATGCCCACAGATCAA
CTGGAATGGATGGTACAGCTGTGTGGTGCTTCTGTGGTGAAGGAGCTTTCATCATTCACC
CTTGGCACAgaagtattgggtgccctgtcagagagggaggacacaatatctctcctgt
gagcaagactggcacctgtcagtcacctatggatgccctactgtagcctcagaagtcttc
tctgcccacatacctgtgccaaaagactccatctgtaagggatggGGTGTCCACCCAAT
TGTGGTTGTGCAGCCAGATGCCTGGACAGAGGACAATGGCTTCCATGCAATTGGGCAGAT
GTGTGAGGCACCTGTGGTGACCCGAGAGTGGGTGTTGGACAGTGTAGCACTCTACCAGTG
CCAGGAGCTGGACACCTACCTGATACCCCAGATCCCCCACAGCCACT
```

**Figure S1.** (a) FASTA sequence of a *wt* cDNA spanning from exon 20 to 23: exon 20 in yellow, 21 in green, 22 in violet and 23 in blue; (b) FASTA sequence of the cDNA of the patient bearing the c.5406+2T>C splice variant (in lower case and in red) showing the 156 retained bases of intron 21: exon 20 in yellow, 21 in green, 22 in violet and 23 in blue; the retained intron sequence is reported in lower case and white.

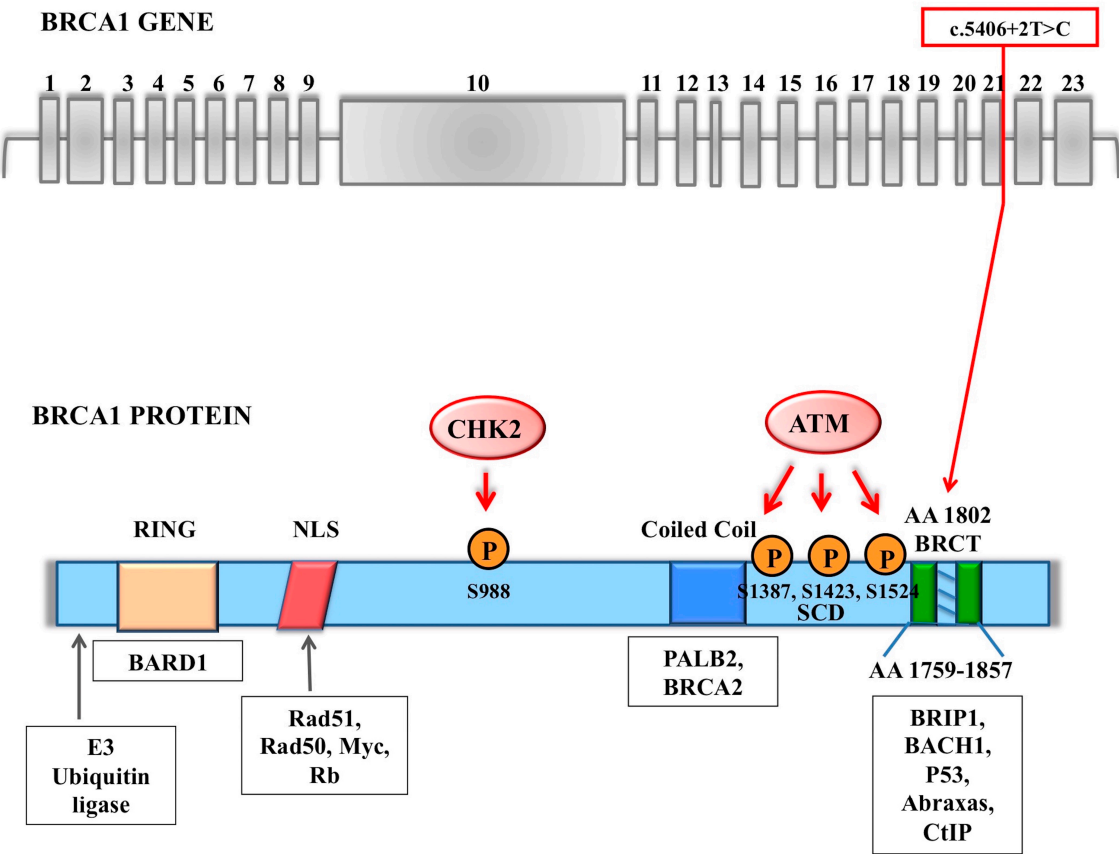

**Figure S2.** Schematic view of the BRCA1 protein and its interacting proteins. The function of the 3'-end proximity BRCT domain could be impaired by the c.5406+2T>C splice variant consequent to the altered repair of the double-strand break. The cross-talk with other proteins that interfere with the function of BRCA1 are indicated in boxes and the activating kinases are indicated by pink ovals and arrows.

**Table S1.** Primers used to assess the sequence regions of the novel *BRCA1* splicing variant (red and blue arrows correspond to those in Figure 1c).

| Primer Sequences on BRCA1 cDNA |                                                   | Product Length (bp) |           |
|--------------------------------|---------------------------------------------------|---------------------|-----------|
|                                |                                                   | Wild Type           | 5406+2T>C |
| Blue arrows<br>→               | (a) BRCA1_cDNA_Fw: CAACATGCCCACAGATCAAC           | 825                 | 981       |
|                                | (b) BRCA1_cDNA_Rw: AATTTCCTCCCCAATGTTCC           |                     |           |
| Red arrows<br>→                | (c) cDNA_ex20/21_Fw: CAACATGCCCACAGATCAACTGGAATGG | 165                 | 321       |
|                                | (d) cDNA_ex22/23_Rw: CATCTGCCCAATTGCATGGAAGCCATTG |                     |           |
